# Supplementary material for: Accelerometer compared with questionnaire measures of physical activity in relation to body size and composition: a large cross-sectional analysis of UK Biobank
Source: PubMed Central journal article supplement (PMC6352868; doi:10.1136/bmjopen-2018-024206), 2019-01-29
Supplement: bmjopen-2018-024206supp003.pdf [file bmjopen-2018-024206supp003.pdf]

**Supplementary Table 2. Spearman correlation between self-reported physical activity and accelerometer-measured physical activity, according to participant characteristics in UK Biobank men**

|                                             | <b>N Men (%)</b> | <b>Correlation</b> | <b>95% Confidence Interval</b> |
|---------------------------------------------|------------------|--------------------|--------------------------------|
| <b>Total</b>                                | 35,955           | 0.24               | 0.23, 0.25                     |
| <b>Age group at recruitment (years)</b>     |                  |                    |                                |
| <55 years                                   | 13,214 (36.8)    | 0.31               | 0.29, 0.32                     |
| 55+ years                                   | 22,741 (63.3)    | 0.22               | 0.21, 0.23                     |
| <b>Socioeconomic status, fifths</b>         |                  |                    |                                |
| Top fifth                                   | 7,584 (21.1)     | 0.23               | 0.21, 0.25                     |
| Bottom fifth                                | 6,800 (18.9)     | 0.26               | 0.23, 0.28                     |
| <b>BMI (kg/m<sup>2</sup>)</b>               |                  |                    |                                |
| <25                                         | 10,590 (29.5)    | 0.27               | 0.25, 0.28                     |
| 25-29.9                                     | 17,874 (49.7)    | 0.21               | 0.19, 0.22                     |
| >30                                         | 7,491 (20.8)     | 0.22               | 0.20, 0.24                     |
| <b>College or university degree</b>         |                  |                    |                                |
| Yes                                         | 16,709 (46.5)    | 0.25               | 0.24, 0.27                     |
| No                                          | 19,246 (53.5)    | 0.24               | 0.22, 0.25                     |
| <b>Current employment status</b>            |                  |                    |                                |
| In paid employment or self-employed         | 22,942 (63.8)    | 0.27               | 0.26, 0.28                     |
| Retired                                     | 11,361 (31.6)    | 0.24               | 0.22, 0.26                     |
| Other                                       | 1,652 (4.6)      | 0.30               | 0.26, 0.34                     |
| <b>Job involves mainly walking/standing</b> |                  |                    |                                |
| Never or rarely                             | 9,825 (42.8)     | 0.29               | 0.27, 0.31                     |
| Sometimes                                   | 7,534 (32.9)     | 0.24               | 0.22, 0.26                     |
| Usually or Always                           | 5,574 (24.3)     | 0.19               | 0.16, 0.21                     |
| <b>Job involves heavy manual work</b>       |                  |                    |                                |
| Never, rarely                               | 16,443 (71.7)    | 0.27               | 0.26, 0.29                     |
| Sometimes                                   | 4,160 (18.1)     | 0.17               | 0.14, 0.19                     |
| Usually or Always                           | 2,335 (10.2)     | 0.12               | 0.08, 0.16                     |
| <b>Alcohol intake frequency</b>             |                  |                    |                                |
| Weekly or more                              | 29,421 (81.8)    | 0.23               | 0.22, 0.24                     |
| Less than weekly                            | 6,530 (18.2)     | 0.28               | 0.26, 0.30                     |
| <b>Smoking status</b>                       |                  |                    |                                |
| Never                                       | 18,928 (52.6)    | 0.26               | 0.24, 0.27                     |
| Ever                                        | 16,964 (47.2)    | 0.22               | 0.21, 0.24                     |
| <b>Long-standing illness or disability</b>  |                  |                    |                                |
| No                                          | 25,129 (69.9)    | 0.23               | 0.22, 0.24                     |
| Yes                                         | 10,825 (30.1)    | 0.25               | 0.23, 0.27                     |
