# Supplementary material for: Accelerometer compared with questionnaire measures of physical activity in relation to body size and composition: a large cross-sectional analysis of UK Biobank
Source: PubMed Central journal article supplement (PMC6352868; doi:10.1136/bmjopen-2018-024206), 2019-01-29
Supplement: bmjopen-2018-024206supp004.pdf [file bmjopen-2018-024206supp004.pdf]

**Supplementary Table 3. Spearman correlation between self-reported physical activity and accelerometer-measured physical activity, according to participant characteristics in UK Biobank women**

|                                             | <b>N Women (%)</b> | <b>Correlation</b> | <b>95% Confidence Interval</b> |
|---------------------------------------------|--------------------|--------------------|--------------------------------|
| <b>Total</b>                                | 42,992             | 0.22               | 0.21, 0.23                     |
| <b>Age group at recruitment (years)</b>     |                    |                    |                                |
| <55 years                                   | 18,973 (44.1)      | 0.26               | 0.25, 0.28                     |
| 55+ years                                   | 24,019 (55.9)      | 0.20               | 0.19, 0.22                     |
| <b>Socioeconomic status, fifths</b>         |                    |                    |                                |
| Top fifth                                   | 8,401 (19.5)       | 0.22               | 0.30, 0.24                     |
| Bottom fifth                                | 8,744 (20.3)       | 0.22               | 0.30, 0.24                     |
| <b>BMI (kg/m<sup>2</sup>)</b>               |                    |                    |                                |
| <25                                         | 20,255 (47.1)      | 0.21               | 0.20, 0.23                     |
| 25-29.9                                     | 15,146 (35.2)      | 0.18               | 0.17, 0.20                     |
| >30                                         | 7,591 (17.7)       | 0.15               | 0.13, 0.17                     |
| <b>College or university degree</b>         |                    |                    |                                |
| Yes                                         | 19,214 (44.7)      | 0.22               | 0.21, 0.24                     |
| No                                          | 23,778 (55.3)      | 0.22               | 0.20, 0.23                     |
| <b>Current employment status</b>            |                    |                    |                                |
| In paid employment or self-employed         | 26,693 (62.1)      | 0.24               | 0.23, 0.25                     |
| Retired                                     | 12,710 (29.6)      | 0.22               | 0.20, 0.24                     |
| Other                                       | 3,589 (8.4)        | 0.30               | 0.27, 0.33                     |
| <b>Job involves mainly walking/standing</b> |                    |                    |                                |
| Never or rarely                             | 12,191 (45.7)      | 0.25               | 0.23, 0.27                     |
| Sometimes                                   | 7,839 (29.4)       | 0.21               | 0.19, 0.23                     |
| Usually or Always                           | 6,648 (24.9)       | 0.18               | 0.16, 0.20                     |
| <b>Job involves heavy manual work</b>       |                    |                    |                                |
| Never, rarely                               | 20,762 (77.8)      | 0.24               | 0.22, 0.25                     |
| Sometimes                                   | 4,353 (16.3)       | 0.17               | 0.14, 0.20                     |
| Usually or Always                           | 1,567 (5.9)        | 0.13               | 0.08, 0.18                     |
| <b>Alcohol intake frequency</b>             |                    |                    |                                |
| Weekly or more                              | 29,829 (69.4)      | 0.22               | 0.21, 0.23                     |
| Less than weekly                            | 13,152 (30.6)      | 0.21               | 0.20, 0.23                     |
| <b>Smoking status</b>                       |                    |                    |                                |
| Never                                       | 25,998 (60.5)      | 0.21               | 0.20, 0.22                     |
| Ever                                        | 16,936 (39.4)      | 0.23               | 0.22, 0.25                     |
| <b>Long-standing illness or disability</b>  |                    |                    |                                |
| No                                          | 32,307 (75.2)      | 0.21               | 0.20, 0.22                     |
| Yes                                         | 10,685 (24.9)      | 0.23               | 0.21, 0.24                     |
