# Supplementary material for: Accelerometer compared with questionnaire measures of physical activity in relation to body size and composition: a large cross-sectional analysis of UK Biobank
Source: PubMed Central journal article supplement (PMC6352868; doi:10.1136/bmjopen-2018-024206), 2019-01-29
Supplement: bmjopen-2018-024206supp005.pdf [file bmjopen-2018-024206supp005.pdf]

**Supplementary Table 4. Association of self-reported and accelerometer-measured physical activity with measures of adiposity**

|                             | N     | BMI<br>(kg/m <sup>2</sup> ) | 95% CI       | Body fat<br>percent | 95% CI       | Waist<br>circumference<br>(cm) | 95% CI         |
|-----------------------------|-------|-----------------------------|--------------|---------------------|--------------|--------------------------------|----------------|
| <b>Men</b>                  |       |                             |              |                     |              |                                |                |
| <b>Questionnaire</b>        |       |                             |              |                     |              |                                |                |
| Bottom tenth (least active) | 3,643 | 0.00 (reference)            |              | 0.00 (reference)    |              | 0.00 (reference)               |                |
| 2nd tenth                   | 3,742 | -0.69                       | -0.87, -0.52 | -0.99               | -1.23, -0.74 | -1.97                          | -2.45, -1.50   |
| 3rd tenth                   | 3,410 | -0.91                       | -1.09, -0.73 | -1.42               | -1.68, -1.17 | -2.89                          | -3.38, -2.41   |
| 4th tenth                   | 3,677 | -1.22                       | -1.40, -1.05 | -1.97               | -2.22, -1.72 | -3.81                          | -4.29, -3.34   |
| 5th tenth                   | 3,522 | -1.32                       | -1.50, -1.14 | -2.14               | -2.39, -1.88 | -4.47                          | -4.95, -3.99   |
| 6th tenth                   | 3,584 | -1.45                       | -1.63, -1.27 | -2.50               | -2.75, -2.24 | -4.79                          | -5.27, -4.31   |
| 7th tenth                   | 3,596 | -1.59                       | -1.76, -1.41 | -2.88               | -3.13, -2.63 | -5.41                          | -5.89, -4.93   |
| 8th tenth                   | 3,591 | -1.63                       | -1.81, -1.45 | -3.09               | -3.34, -2.83 | -5.92                          | -6.40, -5.44   |
| 9th tenth                   | 3,595 | -1.71                       | -1.89, -1.53 | -3.21               | -3.46, -2.95 | -6.33                          | -6.81, -5.85   |
| Top tenth (most active)     | 3,595 | -1.77                       | -1.95, -1.59 | -3.56               | -3.81, -3.31 | -6.42                          | -6.90, -5.93   |
| <b>Accelerometer</b>        |       |                             |              |                     |              |                                |                |
| Bottom tenth (least active) | 3,598 | 0.00 (reference)            |              | 0.00 (reference)    |              | 0.00 (reference)               |                |
| 2nd tenth                   | 3,604 | -0.77                       | -0.95, -0.60 | -0.99               | -1.24, -0.75 | -2.23                          | -2.70, -1.76   |
| 3rd tenth                   | 3,592 | -1.33                       | -1.50, -1.15 | -1.83               | -2.07, -1.58 | -3.69                          | -4.16, -3.22   |
| 4th tenth                   | 3,610 | -1.60                       | -1.77, -1.42 | -2.20               | -2.45, -1.95 | -4.59                          | -5.06, -4.12   |
| 5th tenth                   | 3,597 | -1.88                       | -2.06, -1.71 | -2.69               | -2.94, -2.44 | -5.43                          | -5.90, -4.96   |
| 6th tenth                   | 3,585 | -2.07                       | -2.24, -1.89 | -3.04               | -3.28, -2.79 | -6.00                          | -6.47, -5.53   |
| 7th tenth                   | 3,589 | -2.32                       | -2.49, -2.14 | -3.52               | -3.77, -3.27 | -7.01                          | -7.49, -6.54   |
| 8th tenth                   | 3,594 | -2.57                       | -2.75, -2.39 | -3.84               | -4.09, -3.59 | -7.69                          | -8.17, -7.22   |
| 9th tenth                   | 3,591 | -3.02                       | -3.20, -2.84 | -4.75               | -5.00, -4.50 | -9.01                          | -9.48, -8.53   |
| Top tenth (most active)     | 3,595 | -3.61                       | -3.79, -3.43 | -5.98               | -6.24, -5.73 | -11.23                         | -11.72, -10.75 |

|                             |       |                  |              |                  |              |                  |                |
|-----------------------------|-------|------------------|--------------|------------------|--------------|------------------|----------------|
| <b>Women</b>                |       |                  |              |                  |              |                  |                |
| <b>Questionnaire</b>        |       |                  |              |                  |              |                  |                |
| Bottom tenth (least active) | 4,433 | 0.00 (reference) |              | 0.00 (reference) |              | 0.00 (reference) |                |
| 2nd tenth                   | 4,187 | -0.81            | -1.00, -0.61 | -1.05            | -1.33, -0.78 | -1.77            | -2.25, -1.29   |
| 3rd tenth                   | 4,278 | -1.37            | -1.57, -1.18 | -1.89            | -2.16, -1.61 | -3.33            | -3.81, -2.86   |
| 4th tenth                   | 4,318 | -1.44            | -1.64, -1.25 | -2.16            | -2.43, -1.88 | -3.74            | -4.22, -3.27   |
| 5th tenth                   | 4,296 | -1.60            | -1.79, -1.40 | -2.44            | -2.72, -2.17 | -3.92            | -4.39, -3.44   |
| 6th tenth                   | 4,308 | -1.86            | -2.05, -1.66 | -2.89            | -3.16, -2.61 | -4.71            | -5.18, -4.23   |
| 7th tenth                   | 4,276 | -1.98            | -2.18, -1.79 | -3.18            | -3.45, -2.90 | -5.02            | -5.50, -4.55   |
| 8th tenth                   | 4,300 | -2.20            | -2.39, -2.00 | -3.57            | -3.85, -3.30 | -5.73            | -6.20, -5.25   |
| 9th tenth                   | 4,305 | -2.28            | -2.48, -2.09 | -3.86            | -4.14, -3.59 | -5.91            | -6.39, -5.44   |
| Top tenth (most active)     | 4,291 | -2.51            | -2.70, -2.31 | -4.25            | -4.52, -3.97 | -6.39            | -6.87, -5.91   |
| <b>Accelerometer</b>        |       |                  |              |                  |              |                  |                |
| Bottom tenth (least active) | 4,314 | 0.00 (reference) |              | 0.00 (reference) |              | 0.00 (reference) |                |
| 2nd tenth                   | 4,292 | -1.14            | -1.33, -0.95 | -1.43            | -1.70, -1.16 | -3.02            | -3.49, -2.56   |
| 3rd tenth                   | 4,293 | -1.84            | -2.03, -1.65 | -2.35            | -2.62, -2.09 | -4.42            | -4.89, -3.95   |
| 4th tenth                   | 4,307 | -2.31            | -2.50, -2.12 | -2.90            | -3.17, -2.63 | -5.43            | -5.90, -4.97   |
| 5th tenth                   | 4,312 | -2.60            | -2.79, -2.41 | -3.52            | -3.79, -3.25 | -6.27            | -6.74, -5.80   |
| 6th tenth                   | 4,286 | -2.92            | -3.11, -2.72 | -4.05            | -4.32, -3.79 | -7.18            | -7.65, -6.71   |
| 7th tenth                   | 4,292 | -3.22            | -3.42, -3.04 | -4.63            | -4.90, -4.36 | -7.88            | -8.35, -7.41   |
| 8th tenth                   | 4,301 | -3.60            | -3.80, -3.41 | -5.34            | -5.61, -5.07 | -8.80            | -9.27, -8.33   |
| 9th tenth                   | 4,305 | -4.17            | -4.36, -3.98 | -6.37            | -6.64, -6.10 | -10.12           | -10.59, -9.64  |
| Top tenth (most active)     | 4,290 | -4.80            | -4.99, -4.60 | -8.06            | -8.33, -7.78 | -11.92           | -12.39, -11.44 |

Analyses are adjusted for age, socioeconomic status, alcohol intake, smoking status, educational qualifications, and employment status. Analyses are further adjusted for parity and hormone replacement therapy use in women.
