# Supplementary material for: Accelerometer compared with questionnaire measures of physical activity in relation to body size and composition: a large cross-sectional analysis of UK Biobank
Source: PubMed Central journal article supplement (PMC6352868; doi:10.1136/bmjopen-2018-024206), 2019-01-29
Supplement: bmjopen-2018-024206supp006.pdf [file bmjopen-2018-024206supp006.pdf]

**Supplementary Table 5. Association of accelerometer-measured physical activity with body fat percent, measured by bioelectrical impedance and dual energy X-ray absorptiometry (DXA) in UK Biobank**

| Accelerometer-measured physical activity | N   | Mean body fat percent | 95% CI     | Coefficient            | 95% CI       |
|------------------------------------------|-----|-----------------------|------------|------------------------|--------------|
| <b>Men</b>                               |     |                       |            |                        |              |
| <b>Measured by impedance</b>             |     |                       |            |                        |              |
| Bottom fifth (least active)              | 237 | 27.4                  | 26.7, 28.0 | 0.00 (reference group) |              |
| 2nd fifth                                | 231 | 26.0                  | 25.3, 26.6 | -1.29                  | -2.21, -0.38 |
| 3rd fifth                                | 229 | 24.7                  | 24.0, 25.3 | -2.63                  | -3.55, -1.71 |
| 4th fifth                                | 253 | 23.8                  | 23.1, 24.4 | -3.46                  | -4.36, -2.56 |
| Top fifth (most active)                  | 235 | 21.8                  | 21.1, 22.4 | -5.51                  | -6.45, -4.58 |
| <b>Men</b>                               |     |                       |            |                        |              |
| <b>Measured by DXA</b>                   |     |                       |            |                        |              |
| Bottom fifth (least active)              | 237 | 34.1                  | 33.3, 34.8 | 0.00 (reference group) |              |
| 2nd fifth                                | 231 | 31.6                  | 30.9, 32.4 | -2.38                  | -3.45, -1.31 |
| 3rd fifth                                | 229 | 30.0                  | 29.2, 30.7 | -4.12                  | -5.20, -3.05 |
| 4th fifth                                | 253 | 28.7                  | 28.0, 29.4 | -5.48                  | -6.54, -4.42 |
| Top fifth (most active)                  | 235 | 26.1                  | 25.4, 26.9 | -8.18                  | -9.27, -7.08 |
| <b>Women</b>                             |     |                       |            |                        |              |
| <b>Measured by impedance</b>             |     |                       |            |                        |              |
| Bottom fifth (least active)              | 270 | 38.4                  | 37.6, 39.1 | 0.00 (reference group) |              |
| 2nd fifth                                | 244 | 36.6                  | 35.9, 37.4 | -1.46                  | -2.55, -0.37 |
| 3rd fifth                                | 265 | 36.1                  | 35.4, 36.9 | -1.93                  | -3.01, -0.85 |
| 4th fifth                                | 228 | 34.5                  | 33.7, 35.3 | -3.43                  | -4.55, -2.31 |
| Top fifth (most active)                  | 265 | 30.8                  | 30.1, 31.6 | -6.97                  | -8.07, -5.87 |
| <b>Women</b>                             |     |                       |            |                        |              |
| <b>Measured by DXA</b>                   |     |                       |            |                        |              |
| Bottom fifth (least active)              | 270 | 42.5                  | 41.7, 43.3 | 0.00 (reference group) |              |
| 2nd fifth                                | 244 | 40.4                  | 39.6, 41.2 | -1.87                  | -3.04, -0.71 |
| 3rd fifth                                | 265 | 39.8                  | 39.0, 40.6 | -2.55                  | -3.70, -1.40 |
| 4th fifth                                | 228 | 37.1                  | 36.2, 37.9 | -4.98                  | -6.17, -3.78 |
| Top fifth (most active)                  | 265 | 33.3                  | 32.5, 34.1 | -8.83                  | -10.0, -7.65 |

Analyses are adjusted for age, socioeconomic status, alcohol intake, smoking status, educational qualifications, and employment status. Analyses are further adjusted for parity and hormone replacement therapy use in women.
